# Supplementary material
Source: PubMed Central journal article supplement (PMC6648235)
Supplement: Supp_Fig1.pdf [file Supp_Fig1.pdf]

## Supplementary Data

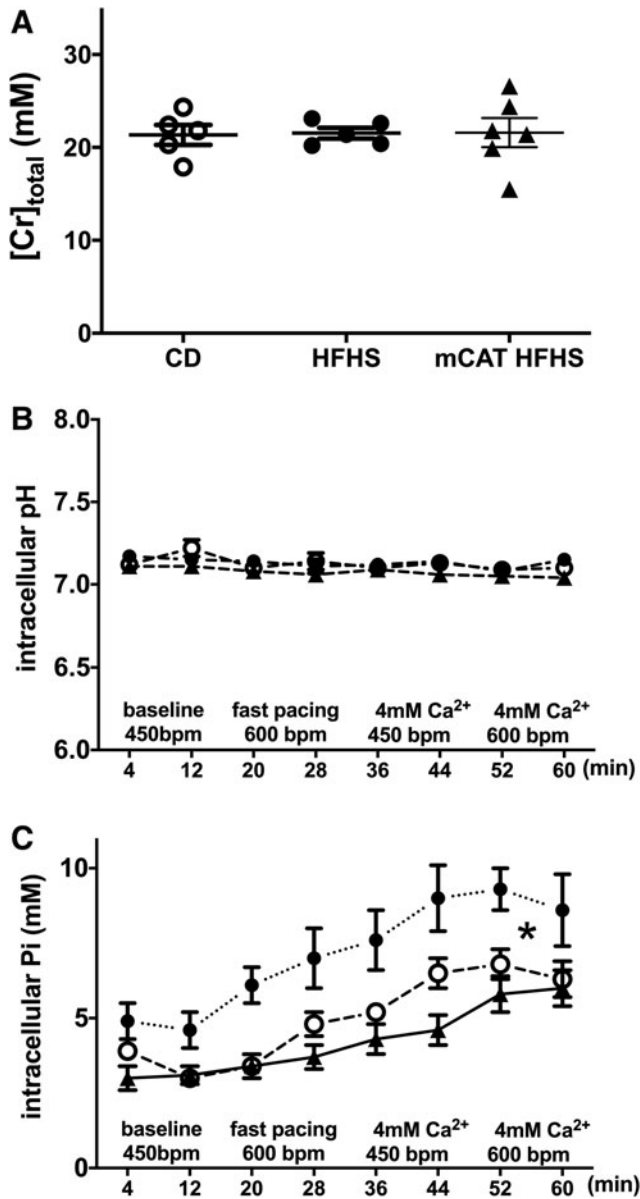

**SUPPLEMENTARY FIG. S1. Total creatine concentration [Cr]<sub>total</sub>, intracellular pH, and intracellular phosphate.** At the end of the protocol depicted in Figures 2–4, total myocardial creatine concentration [Cr]<sub>total</sub> determined by thin-layer chromatography was not different in HFHS- versus CD-fed hearts (A). Intracellular pH was calculated from the chemical shift of the intracellular inorganic phosphate (P<sub>i</sub>) relative to that of PCr (B), and inorganic phosphate (C) was measured by <sup>31</sup>P NMR spectroscopy. Inorganic phosphate was higher in HFHS groups throughout the protocol, whereas mCAT has prevented this increase to a level similar to the CD group. For all panels, data are shown as mean ± SEM; *open circles*=CD-fed mice; *filled circles*=HFHS-fed mice; *triangles*=mCAT HFHS mice (*n*=7–8); and \**p*<0.05 versus CD-fed mice. CD, control diet; HFHS, high fat, high sucrose; mCAT, transgenic expression of catalase targeted to the mitochondrial; NMR, nuclear magnetic resonance; SEM, standard error of the mean.
